# Supplementary material for: The co-inhibitory molecule PD-L1 contributes to regulatory T cell-mediated protection in murine crescentic glomerulonephritis
Source: PubMed Central journal article supplement (PMC6375967; doi:10.1038/s41598-018-38432-3), 2019-02-14
Supplement: 41598_2018_38432_MOESM1_ESM.pdf [file 41598_2018_38432_MOESM1_ESM.pdf]

**The co-inhibitory molecule PD-L1 contributes to regulatory T cell-mediated protection in murine crescentic glomerulonephritis**

Katrin Neumann, Annett Ostmann, Philippe Christophe Breda, Aaron Ochel, Frank Tacke, Hans-Joachim Paust, Ulf Panzer, Gisa Tiegs

Table 1. Sequences of the primer used for analysis of mRNA expression.

| <b>Target</b>  | <b>Forward primer<br/>Reverse primer</b>                          | <b>Amplicon<br/>length</b> | <b>Annealing<br/>temperature</b> |
|----------------|-------------------------------------------------------------------|----------------------------|----------------------------------|
| $\beta$ -actin | 5'-TGGAATCCTGTGGCATCCATGAAA-3'<br>3'-TAAAACGCAGCTCAGTAACAGTCCG-5' | 348 bp                     | 56°C                             |
| IFN $\gamma$   | 5'-GAACGCTACACACTGCATC-3'<br>3'-GAGCTCATTGAATGCTTGG-5'            | 390 bp                     | 56°C                             |
| IL-12p40       | 5'-AGGTCACACTGGACCAAAGG-3'<br>3'-TGGTTTGATGATGTCCCTGA-5'          | 173 bp                     | 60°C                             |
| T-bet          | 5'-ACCTGGACCCAACCTGTCAAC-3'<br>3'-AACTGTGTTCCCGAGGTGTC-5'         | 158 bp                     | 60°C                             |
| CXCL10         | 5'-GCCGTCATTTTCTGCCTCAT-3'<br>3'-TGCAGCGGACCGTCCTT-5'             | 76 bp                      | 60°C                             |
| IL-17A         | 5'-TCCAGAAGGCCCTCAGACTA-3'<br>3'-ACACCCACCAGCATCTTCTC-5'          | 248 bp                     | 60°C                             |
| IL-6           | 5'-GATGGATGCTACCAAACCTGGA-3'<br>3'-GGAAATTGGGGTAGGAAGGA-5'        | 222 bp                     | 60°C                             |
| ROR $\gamma$ t | 5'-GAGCCAAGTTCTCAGTCATGAG-3'<br>3'-GGCCAAACTTGACAGCATCT-5'        | 265 bp                     | 62°C                             |
| Foxp3          | 5'-GGCCCTTCTCCAGGACAGA-3'<br>3'-GCTGATCATGGCTGGGTTGT-5'           | 112 bp                     | 57°C                             |
| PD-L1          | 5'-CTGCCAAAGGACCAGCTTTT-3'<br>3'-GGCTGGATCCACGGAAATTC-5'          | 180 bp                     | 59°C                             |
| PD-L2          | 5'-TGGGGAGATCTGGGGAAGTA-3'<br>3'-TTTTGCCAGGACACTTCTGC-5'          | 190 bp                     | 59°C                             |
| PD-1           | 5'-GGAGCAGAGCTCGTGGTAAC-3'<br>3'-GCTCCTCCTTCAGAGTGTCG-5'          | 229 bp                     | 63°C                             |

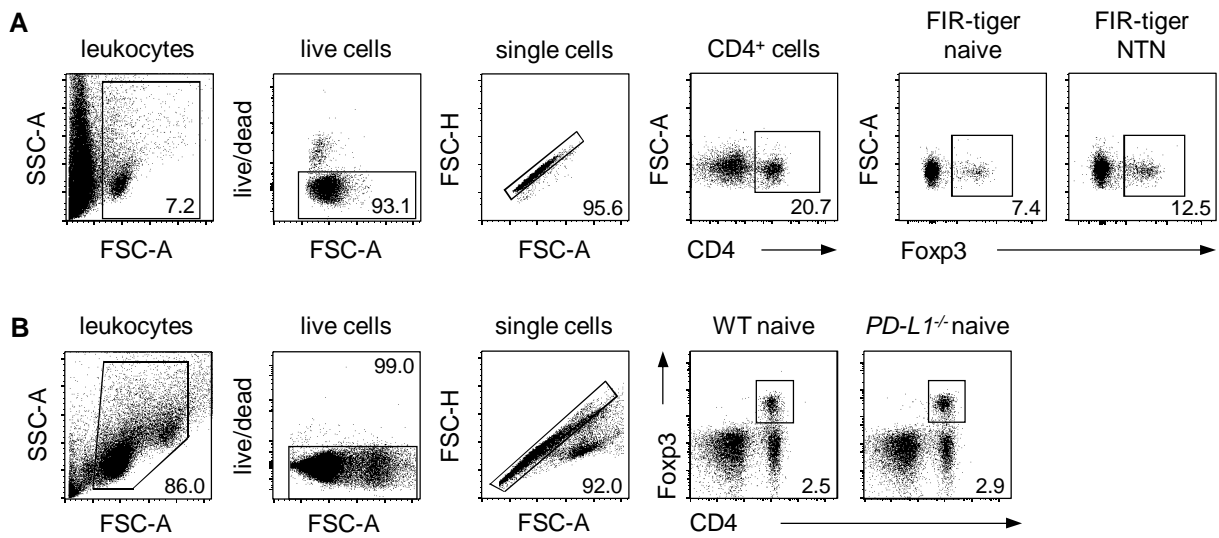

**Supplemental Fig. 1. Gating strategies used in flow cytometry analysis to detect Foxp3<sup>+</sup> Tregs.**

(A) NTN was induced in FIR-tiger mice by i.p. injection of the nephritogenic NTN serum and mice were analyzed 8 days later. Renal cells of naive and nephritic FIR-tiger mice were stained with a live/death dye and an anti-CD4 antibody. Subsequently, living single CD4<sup>+</sup> cells were analyzed for expression of Foxp3 (mRFP). (B) Splenic cells of naive *PD-L1*<sup>-/-</sup> and WT mice were stained with a live/death dye and antibodies directed against CD4 and Foxp3. The frequency of living single CD4<sup>+</sup> Foxp3<sup>+</sup> Tregs was determined. Representative dot plots of one experiment out of two experiments with 4 mice per group are shown.

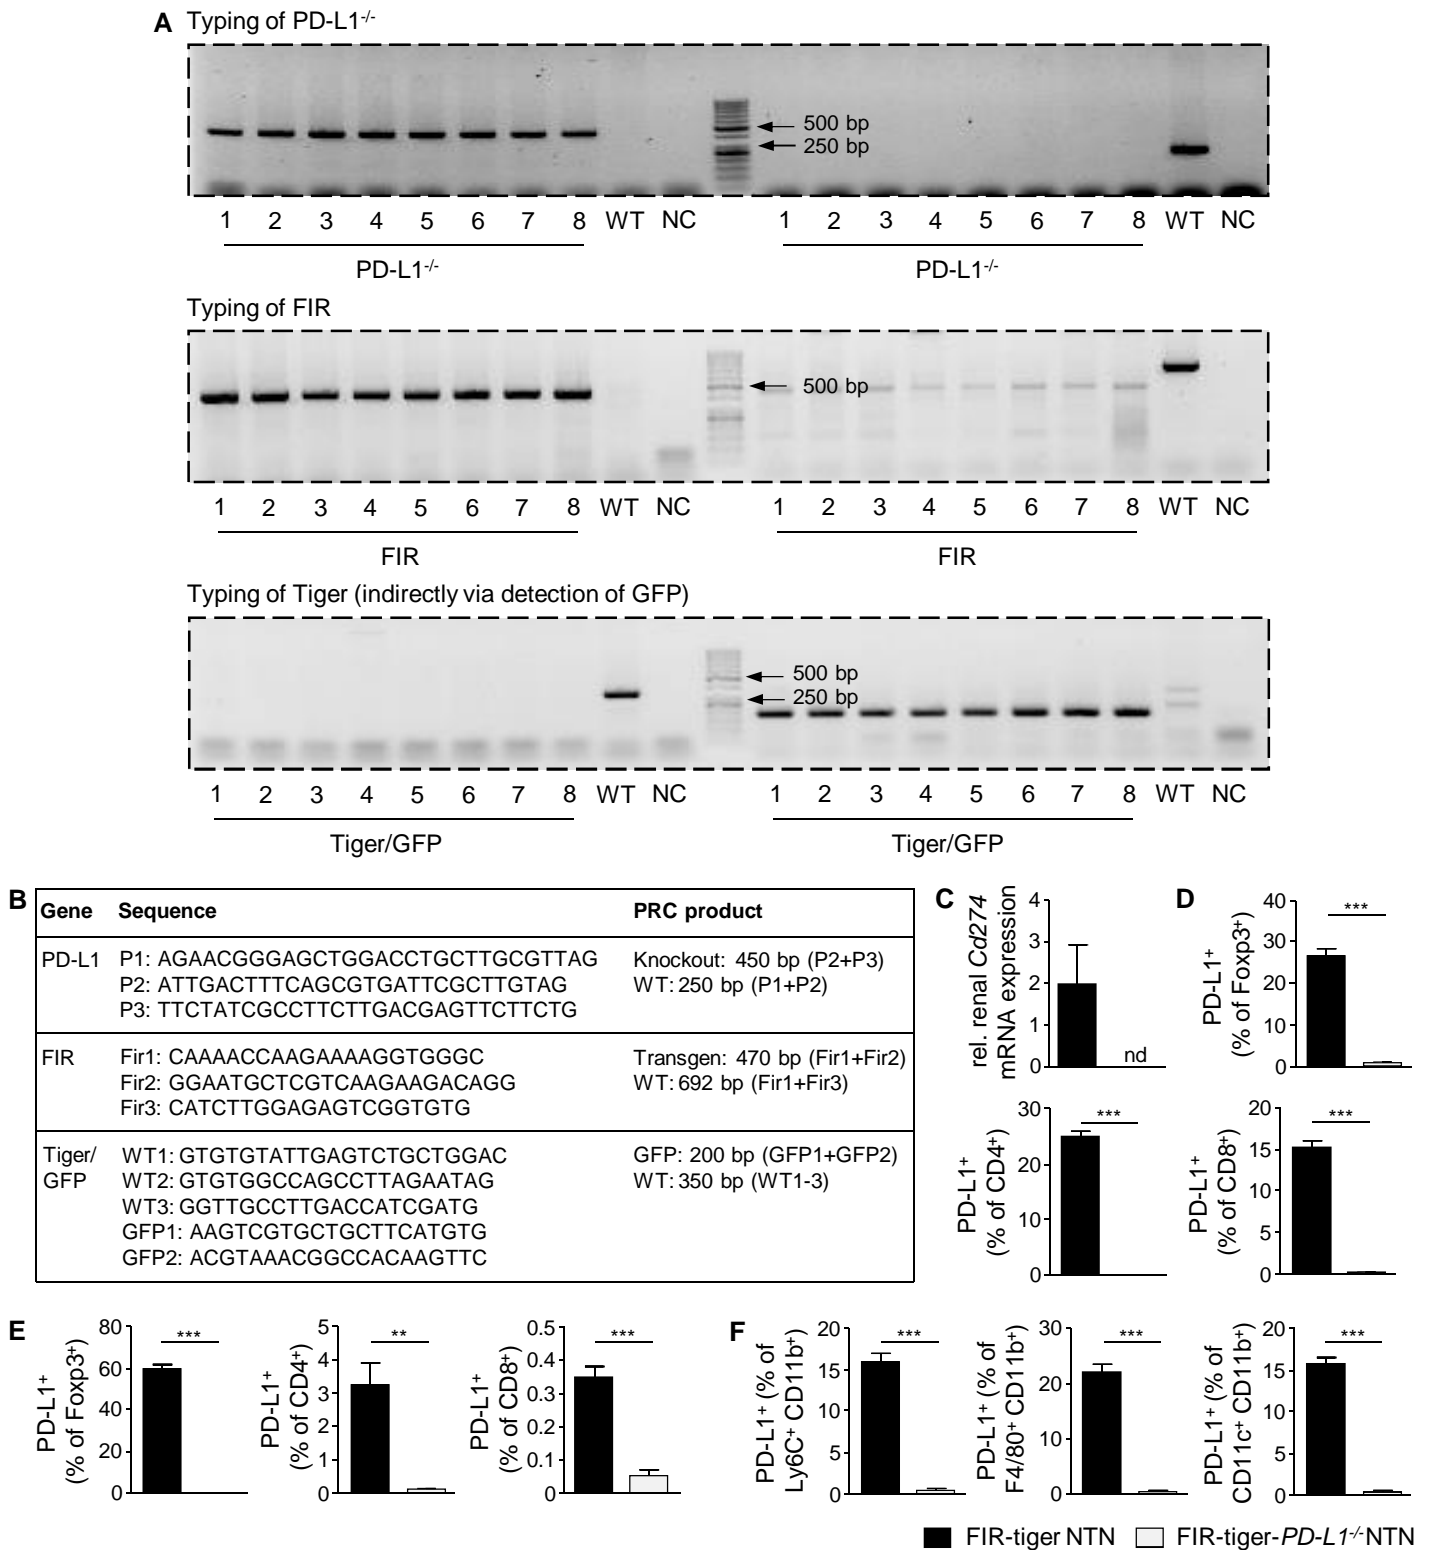

**Supplemental Fig. 2. Genotyping of *Fir*-tiger-*PD-L1*<sup>-/-</sup> mice and expression of *PD-L1* by these mice.** (A) Eight *FIR*-tiger-*PD-L1*<sup>-/-</sup> mice and one WT mice were used for genotyping. Dividing lines mark cropped areas of the gels. Original gels of the typing PCRs are shown in Supplemental Fig. 3. (B) Primer sequences and PCR product size of each analyzed gene are shown. (C) Renal mRNA expression of nephritic *FIR*-tiger and *FIR*-tiger-*PD-L1*<sup>-/-</sup> mice was analyzed by quantitative real-time RT-PCR and normalized to the reference gene  $\beta$ -actin. (D) Frequencies of renal and (E) splenic *PD-L1*-expressing T-cell populations as well as (F) APC populations were analyzed by flow cytometry. *FIR*: *Foxp3*-IRES-mRFP, *Tiger*: *IL-10*-IRES-GFP, WT: wildtype, NC: negative control, GFP: green fluorescent protein, bp: base pairs, nd: not detectable

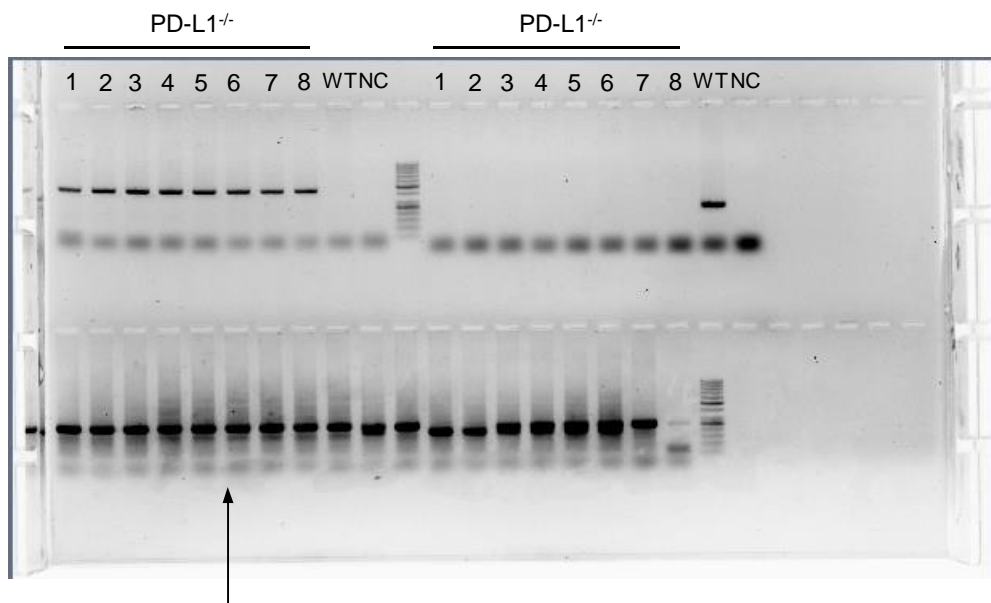

PCR products of another typing independently of FIR-tiger-*PD-L1*<sup>-/-</sup>

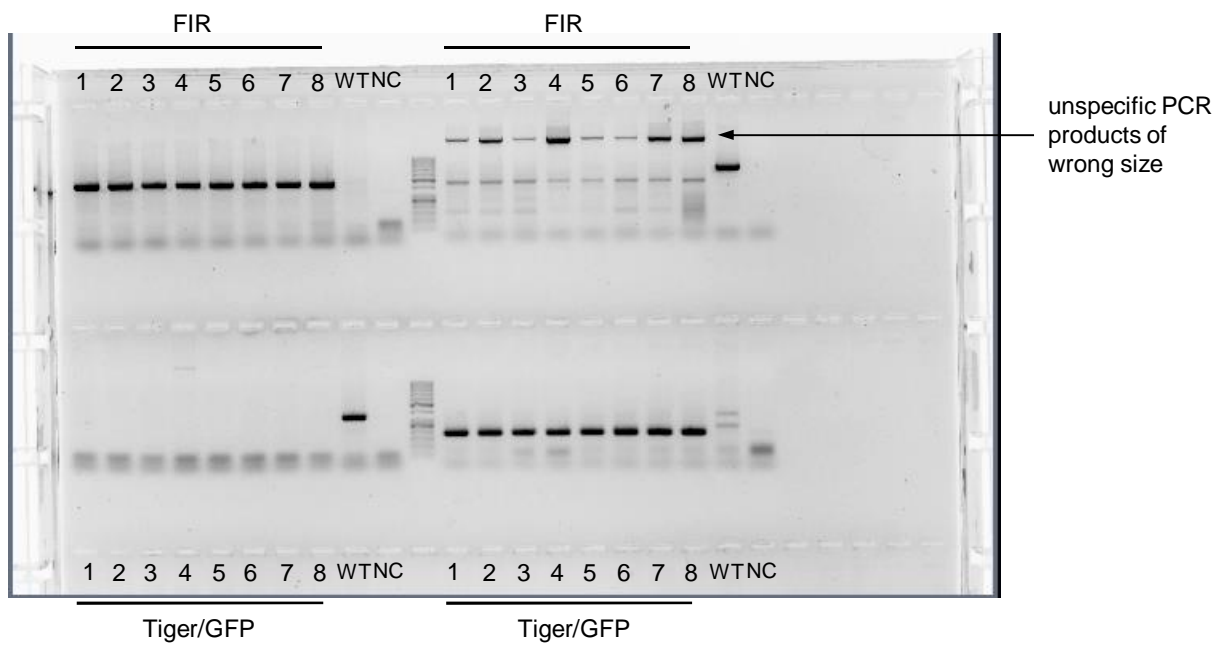

unspecific PCR products of wrong size

**Supplemental Fig. 3. Genotyping of FIR-tiger-*PD-L1*<sup>-/-</sup> mice.** Eight FIR-tiger-*PD-L1*<sup>-/-</sup> mice and one WT mice were used for genotyping. Original gels are shown.

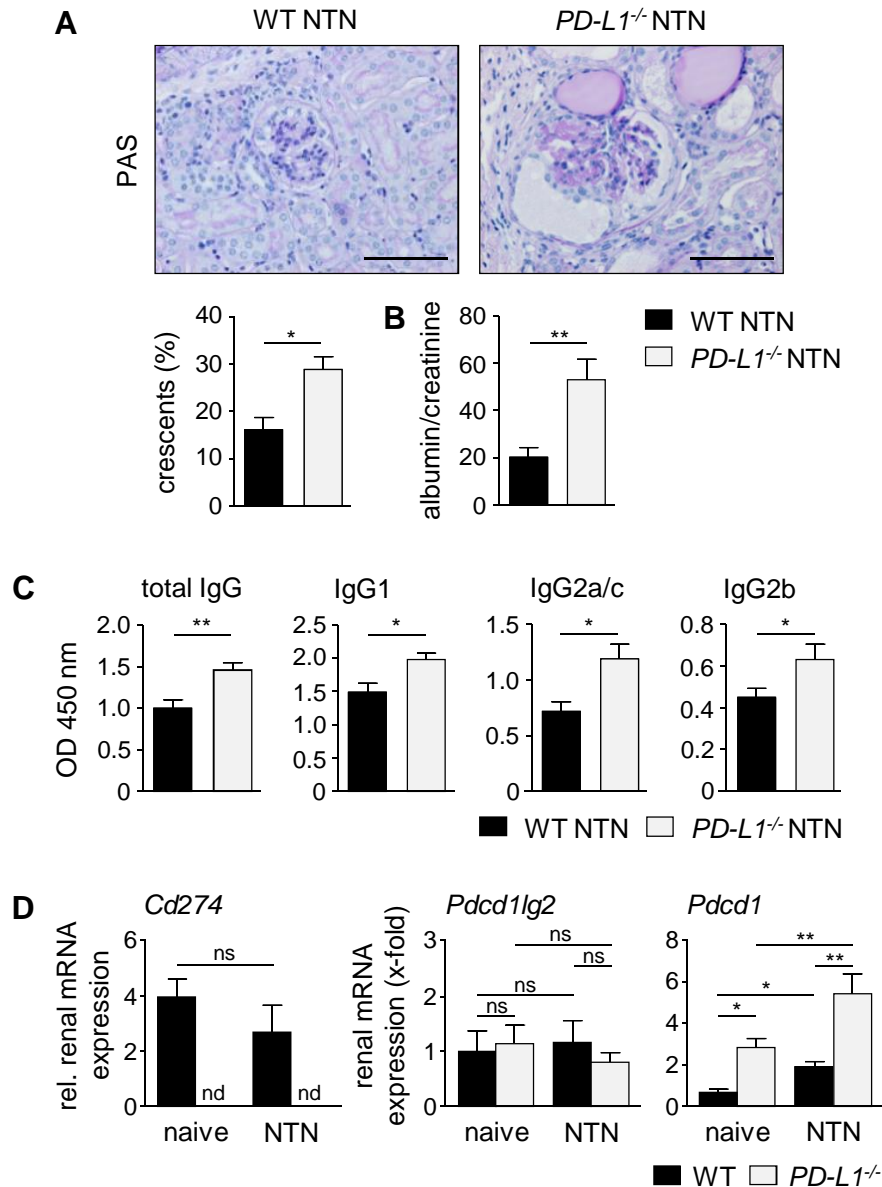

**Supplemental Fig. 4. Exacerbated NTN in nephritic *PD-L1*<sup>-/-</sup> mice.** NTN was induced in *PD-L1*<sup>-/-</sup> and WT mice by i.p. injection of the nephritogenic NTN serum and mice were analyzed 8 days later. (A) Glomerular crescent formation was quantified in PAS-stained kidney sections of nephritic *PD-L1*<sup>-/-</sup> and WT mice. (B) Renal dysfunction was assessed by determination of the albumin-creatinine-ratio in urine by ELISA. (C) Levels of mouse anti-sheep total IgG and isotypes of IgG1, IgG2a/c, and IgG2b were determined in serum of nephritic *PD-L1*<sup>-/-</sup> and WT mice by ELISA. (D) Renal mRNA expression of naive and nephritic *PD-L1*<sup>-/-</sup> and WT mice was analyzed by quantitative real-time RT-PCR and normalized to mRNA expression of naive WT mice. Representative photomicrographs were shown. Scale bar represents 100  $\mu$ m. Mean  $\pm$  SEM of one experiment out of 3 experiments with 5-6 mice per group are shown. \* $p < 0.05$ ; \*\* $p < 0.01$ ; ns, not significant; nd, not detectable; *Cd274*: PD-L1; *Pdccl1lg2*: PD-L2; *Pdccl1*: PD-1

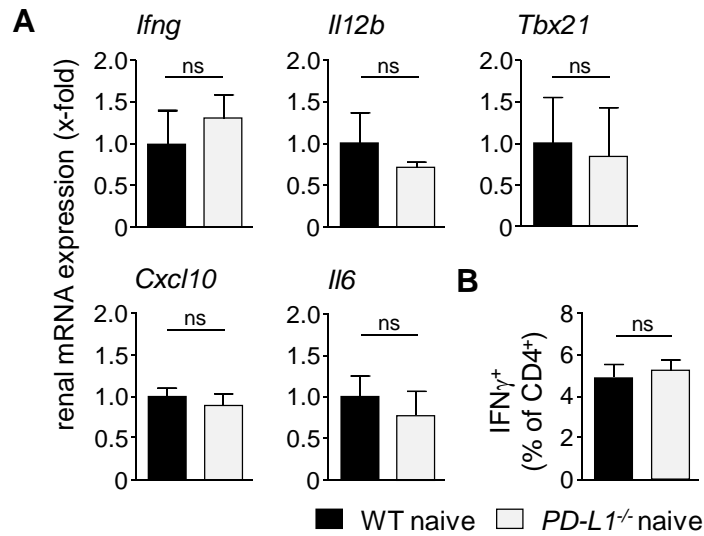

**Supplemental Fig. 5. Phenotype analysis of naive *PD-L1*<sup>-/-</sup> and WT mice.** (A) Renal mRNA expression of naive *PD-L1*<sup>-/-</sup> mice was analyzed by quantitative real-time RT-PCR and normalized to mRNA expression of naive WT mice. (B) Frequency of renal IFN $\gamma$ <sup>+</sup> CD4<sup>+</sup> T cells was determined in naive *PD-L1*<sup>-/-</sup> and WT mice by flow cytometry. Mean  $\pm$  SEM of 6 mice per group are shown. ns, not significant; *Il12b*: IL-12 subunit p40; *Tbx21*: T-bet; *Rorc*: ROR $\gamma$ t

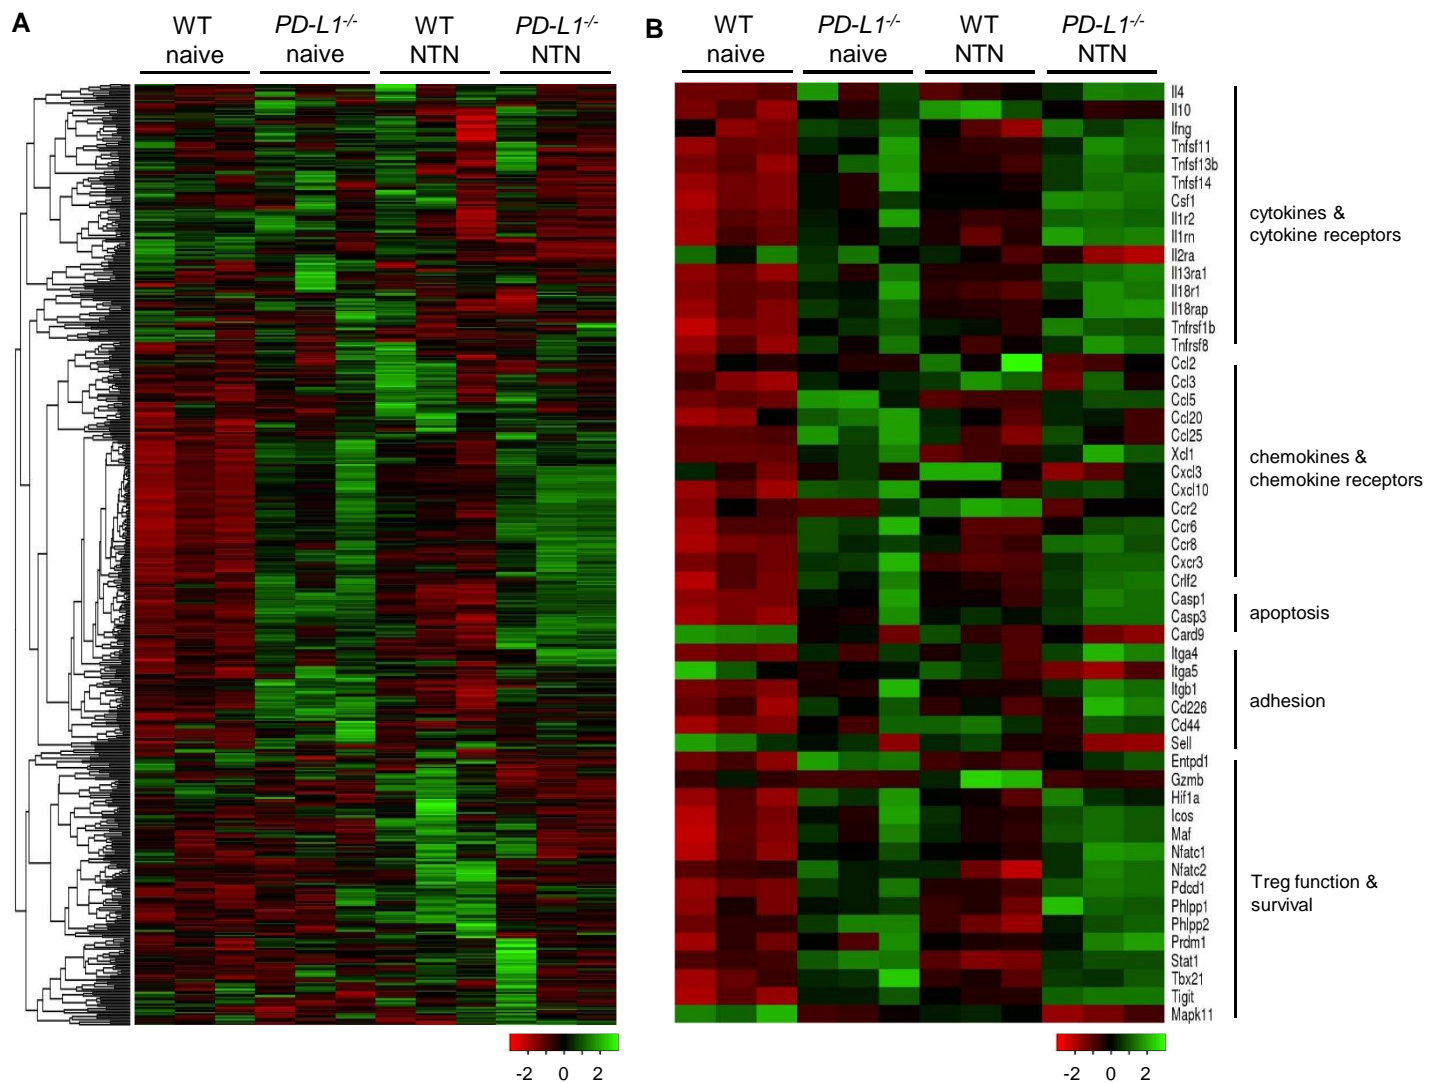

**Supplemental Fig. 6. Gen expression profile of Tregs in absence and presence of PD-L1.** Foxp3<sup>+</sup> Tregs were isolated by FACS from naive and nephritic FIR-tiger (WT) mice and FIR-tiger-*PD-L1*<sup>-/-</sup> (*PD-L1*<sup>-/-</sup>) mice. NanoString analysis was performed with the nCounter Immunology Panel profiling 561 immunology-related genes. (A) Heatmap of immune-gene expression in Tregs from *PD-L1*<sup>-/-</sup> and WT mice is shown. (B) Heatmap of genes differentially expressed in Tregs from *PD-L1*<sup>-/-</sup> and WT mice is depicted. Heatmaps show data of three independent experiments.
